# Supplementary material
Source: PubMed Central journal article supplement (PMC555521)

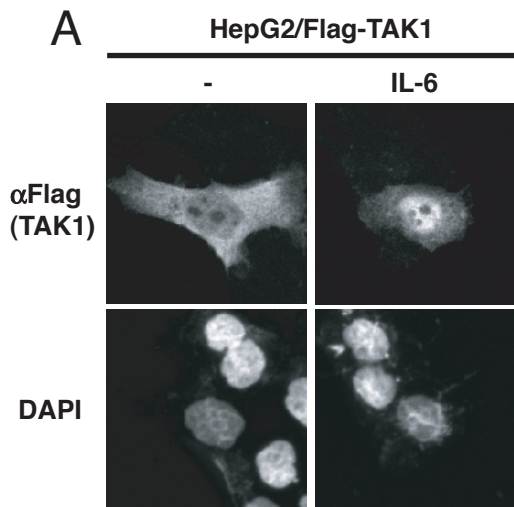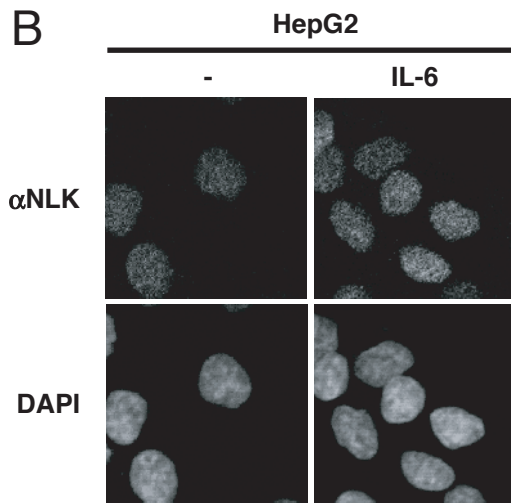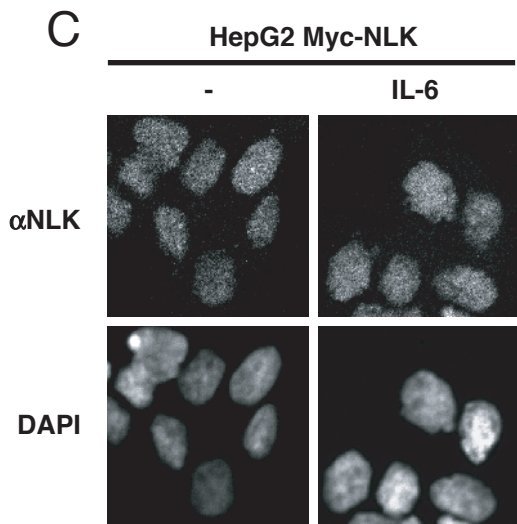

Supplement: pnas_102_12_4524__1.pdf [file pnas_102_12_4524__1.pdf]
